# Supplementary material for: Comparison of Droplet Digital PCR and Seminested Real-Time PCR for Quantification of Cell-Associated HIV-1 RNA
Source: PLoS One. 2014 Jan 21;9(1):e85999. doi: 10.1371/journal.pone.0085999 (PMC3897572; doi:10.1371/journal.pone.0085999)
Supplement: Table S1 — Patient samples information; detection of usRNA and msRNA with ddPCR and seminested qPCR platform. (XLSX) [file pone.0085999.s003.xlsx]

## Sheet: Table S1
Table S1. Patient samples information; detection of usRNA and msRNA with ddPCR and seminested qPCR platform
				usRNA		msRNA		usRNA ⁱ	msRNA ⁱ
Patient samples label	Viral Strain	cART	Cohort	ddPCR log₁₀ (n cDNA copies/ input unit)	seminested qPCR log₁₀ (n RNA copies/input unit)	ddPCR log₁₀ (n cDNA copies/ input unit)	seminested qPCR log₁₀ (n RNA copies/input unit)	ddPCR log₁₀ (n RNA/ input unit)	ddPCR log₁₀ (n RNA/ input unit)
m1	/	yes	Ghent	1.34	2.74	0.24	ND	2.34	1.20
m2	B	yes	Ghent	0.92	2.14	0.26	ND	1.92	1.22
m3	B	yes	Ghent	1.39	2.75	0.57	0.79	2.38	1.53
m4	CRF02_AG	yes	Ghent	1.14	2.38	ND	ND	2.13	ND
m5	B	yes	Ghent	0.82	1.80	0.23	0.00	1.81	1.19
m6	/	yes	Ghent	1.34	2.64	0.27	ND	2.34	1.23
m7	/	yes	Ghent	1.09	2.13	0.23	ND	2.09	1.19
m8	B	no	Ghent	2.19	3.23	1.51	1.36	3.18	2.47
m9	B	no	Ghent	2.36	3.77	1.72	1.74	3.36	2.68
m10	B	no	Ghent	3.12	4.30	2.53	2.72	4.11	3.50
m11	B	no	Ghent	ND	2.90	1.50	2.26	ND	2.46
A1	B	yes	Amsterdam	0.20	0.32	ND	ND	1.19	ND
A2	B	yes	Amsterdam	0.73	ND	0.26	ND	1.73	1.22
A3	B	no	Amsterdam	0.25	1.72	0.83	0.98	1.25	1.79
A4	B	yes	Amsterdam	1.00	1.76	ND	ND	2.00	ND
A5	B	no	Amsterdam	1.08	3.13	0.29	1.10	2.08	1.25
A6	B	yes	Amsterdam	0.51	2.41	ND	D	1.51	ND
A7	B	yes	Amsterdam	ND	2.14	ND	ND	ND	ND
A8	B	yes	Amsterdam	0.86	2.04	ND	ND	1.85	ND
A9	B	yes	Amsterdam	0.70	1.49	0.22	ND	1.70	1.18
A10	CRF01_AE	no	Amsterdam	0.87	ND	ND	ND	1.87	ND
A11	CRF01_AE	yes	Amsterdam	ND	ND	ND	ND	ND	ND
A12	B	no	Amsterdam	0.81	1.63	ND	ND	1.80	ND
A13	B	no	Amsterdam	2.00	2.23*			3.00
A14	B	yes	Amsterdam	0.75	1.81*			1.75
A15	B	no	Amsterdam	3.00	4.47*			4.00
A16	B	yes	Amsterdam	0.69	1.25*			1.69
A17	B	yes	Amsterdam	0.64	2.20*			1.64
A18	B	yes	Amsterdam	1.04	2.51*			2.04
A19	B	no	Amsterdam	2.56	3.76*			3.56
A20	B	yes	Amsterdam	0.89	1.93*			1.89
A21	B	no	Amsterdam	1.96	2.90*			2.96
A22	B	yes	Amsterdam	0.99	1.34*			1.99
A23	B	no	Amsterdam	0.82	0.79*			1.82
ND - not detected;
D- detected;
[i]- converted cDNA copy numbers (raw data ddPCR) to RNA copy numbers;
*- samples labeled with asterisk are normalized to 4 µl cDNA input
