# Supplementary material for: Comparison of Droplet Digital PCR and Seminested Real-Time PCR for Quantification of Cell-Associated HIV-1 RNA
Source: PLoS One. 2014 Jan 21;9(1):e85999. doi: 10.1371/journal.pone.0085999 (PMC3897572; doi:10.1371/journal.pone.0085999)
Supplement: Table S2 — Primers and probes used in this study. (XLSX) [file pone.0085999.s004.xlsx]

## Sheet: Table S2
Table S2. Primers and probes used in this study
Assay	Genomic region	Name	Use in seminested qPCR	Use in ddPCR	Sequence	Amplicon length
usRNA	gag	GAG1	Sense I, II[i]	Sense	5’-TCAGCCCAGAAGTAATACCCATGT-3’
		SK431	Antisense I	Not used	5’-TGCTATGTCAGTTCCCCTTGGTTCTCT-3’	I - 221 bp
		GAG2	Antisense II	Antisense	5’- CACTGTGTTTAGCATGGTGTTT-3’	II - 83 bp
		GAG3	Probe	Probe	5’-ATTATCAGAAGGAGCCACCCCACAAGA-3’
msRNA	tat/rev	ks1	Sense I	Sense	5’-CTTAGGCATCTCCTATGGCAGGAA-3’	I - 171 bp
		mf83	Antisense I, II	Antisense	5’-GGATCTGTCTCTGTCTCTCTCTCCACC-3’
		mf84	Sense II	Not used	5’-ACAGTCAGACTCATCAAGTTTCTCTATCAAAGCA-3’	II - 115 bp
		ks2-tq	Probe	Probe	5’-TTCCTTCGGGCCTGTCGGGTCCC-3’
I - first PCR; II – second PCR
