# Supplementary material for: Comparison of Droplet Digital PCR and Seminested Real-Time PCR for Quantification of Cell-Associated HIV-1 RNA
Source: PLoS One. 2014 Jan 21;9(1):e85999. doi: 10.1371/journal.pone.0085999 (PMC3897572; doi:10.1371/journal.pone.0085999)
Supplement: Table S3 — Raw data from the ddPCR experiments for usRNA and msRNA assays in patient samples. (XLSX) [file pone.0085999.s005.xlsx]

## Sheet: Table S3
Table S3. Raw data from the ddPCR experiments for usRNA and msRNA assays in patient samples
Patient			usRNA		msRNA
sample label	on cART	Cohort	Positive events	Total number of events	Positive events	Total number of events
m1	yes	Ghent	15	14947	1	12761
m2	yes	Ghent	5	13123	1	11986
m3	yes	Ghent	17	15249	2	11742
m4	yes	Ghent	8	12784	0	12674
m5	yes	Ghent	4	13439	1	12896
m6	yes	Ghent	15	14990	1	11767
m7	yes	Ghent	7	12414	1	13001
m8	no	Ghent	109	15518	20	13668
m9	no	Ghent	124	11941	25	10993
m10	no	Ghent	807	14005	204	13257
m11	no	Ghent	0	12791	18	12482
A1	yes	Amsterdam	1	14005	0	10186
A2	yes	Amsterdam	3	12195	1	12105
A3	no	Amsterdam	1	12284	4	12975
A4	yes	Amsterdam	6	13065	0	13047
A5	no	Amsterdam	8	14466	1	11233
A6	yes	Amsterdam	2	13492	0	14536
A7	yes	Amsterdam	0	14012	0	12831
A8	yes	Amsterdam	5	15280	0	12700
A9	yes	Amsterdam	3	13074	1	13358
A10	no	Amsterdam	4	11780	0	10749
A11	yes	Amsterdam	0	11571	0	12252
A12	no	Amsterdam	4	13661	0	13474
A13	no	Amsterdam	58	12863
A14	yes	Amsterdam	6	11643
A15	no	Amsterdam	595	13209
A16	yes	Amsterdam	9	13459
A17	yes	Amsterdam	5	15263
A18	yes	Amsterdam	8	14112
A19	no	Amsterdam	242	14620
A20	yes	Amsterdam	11	14132
A21	no	Amsterdam	72	13069
A22	yes	Amsterdam	5	11377
A23	no	Amsterdam	12	13253
NTC 1*			0	14248
NTC 2*			3	15251	0	14077
NTC 3*			0	14340	2	13989
